# Supplementary material for: Enrichment of Olive Oils with Natural Bioactive Compounds from Aromatic and Medicinal Herbs: Phytochemical Analysis and Antioxidant Potential
Source: MDPI journal article supplement (doi:10.3390/molecules29051141), 2024-03-04
Supplement: s1 [file s1]

**Figure S2-A:** LTQ/Orbitrap HRMS Chromatogram of *Origanum vulgare* ssp *hirtum* methanol extract.

**Figure S2-B:** LTQ/Orbitrap HRMS Chromatogram of *Rosmarinus officinalis* methanol extract.

**Figure S2-C:** LTQ/Orbitrap HRMS Chromatogram of *Salvia triloba* methanol extract.

**Figure S2-D:** LTQ/Orbitrap HRMS Chromatogram of hydro-methanolic extracts [MeOH-H<sub>2</sub>O (80:20, v/v)] of the enriched “Lianolia Prevezas” olive oil with *Origanum vulgare* ssp *hirtum*.

**Figure S2-E:** LTQ/Orbitrap HRMS Chromatogram of hydro-methanolic extracts [MeOH-H<sub>2</sub>O (80:20, v/v)] of the enriched “Lianolia Prevezas” olive oil with *Rosmarinus officinalis*.

**Figure S2-F:** LTQ/Orbitrap HRMS Chromatogram of hydro-methanolic extracts [MeOH-H<sub>2</sub>O (80:20, v/v)] of the enriched “Lianolia Prevezas” olive oil with *Salvia triloba*.

**Figure S2-G:** LTQ/Orbitrap HRMS Chromatogram of hydro-methanolic extracts [MeOH-H<sub>2</sub>O (80:20, v/v)] of the enriched “Konservoelia Artas” olive oil with *Origanum vulgare* ssp *hirtum*.

**Figure S2-H:** LTQ/Orbitrap HRMS Chromatogram of hydro-methanolic extracts [MeOH-H<sub>2</sub>O (80:20, v/v)] of the enriched “Konservoelia Artas” olive oil with *Rosmarinus officinalis*.

**Figure S2-I:** LTQ/Orbitrap HRMS Chromatogram of hydro-methanolic extracts [MeOH-H<sub>2</sub>O (80:20, v/v)] of the enriched “Konservoelia Artas” olive oil with *Salvia triloba*.

**Figure S2-J:** LTQ/Orbitrap HRMS Chromatogram of hydro-methanolic extracts [MeOH-H<sub>2</sub>O (80:20, v/v)] of the enriched “Lianoelia Kerkyras” olive oil with *Origanum vulgare* ssp *hirtum*.

**Figure S2-K:** LTQ/Orbitrap HRMS Chromatogram of hydro-methanolic extracts [MeOH-H<sub>2</sub>O (80:20, v/v)] of the enriched “Lianoelia Kerkyras” olive oil with *Rosmarinus officinalis*.

**Figure S2-L:** LTQ/Orbitrap HRMS Chromatogram of hydro-methanolic extracts [MeOH-H<sub>2</sub>O (80:20, v/v)] of the enriched “Lianoelia Kerkyras” olive oil with *Salvia triloba*.

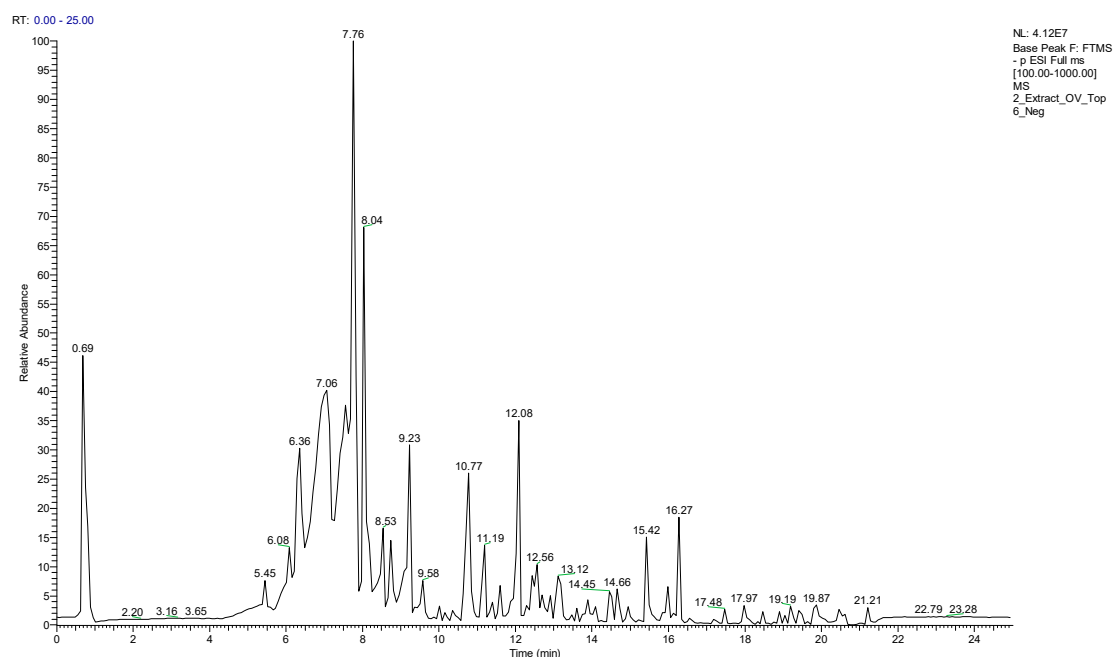

**Figure S2-A:** LTQ/Orbitrap HRMS Chromatogram of *Origanum vulgare* ssp *hirtum* methanol extract in negative ion mode.

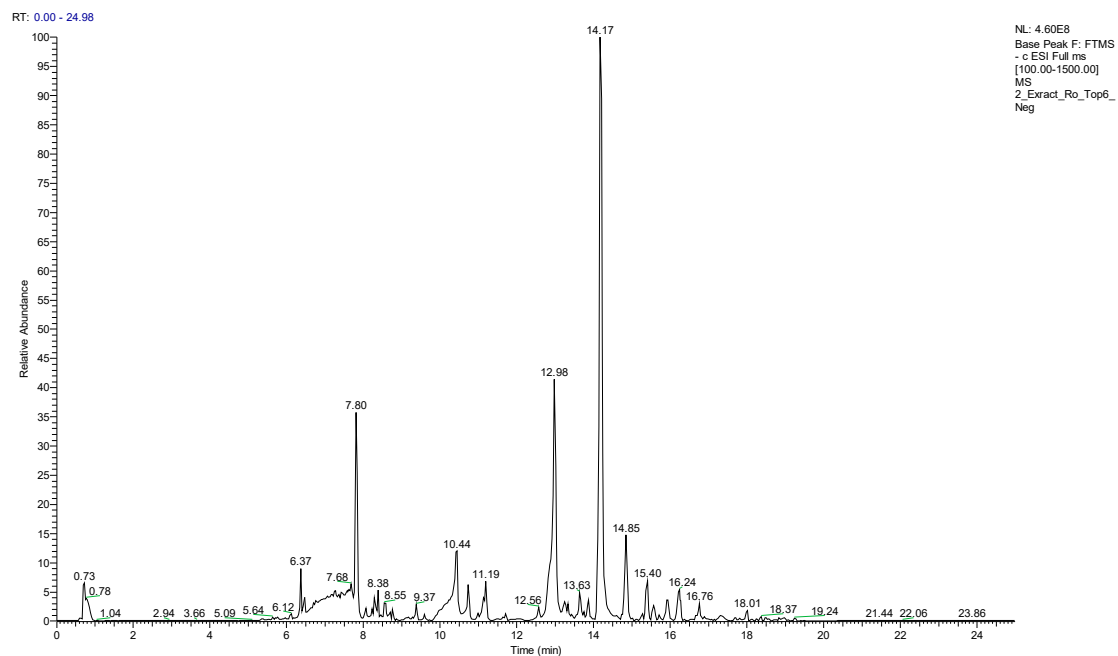

**Figure S2-B:** LTQ/Orbitrap HRMS Chromatogram of *Rosmarinus officinalis* methanol extract in negative ion mode.

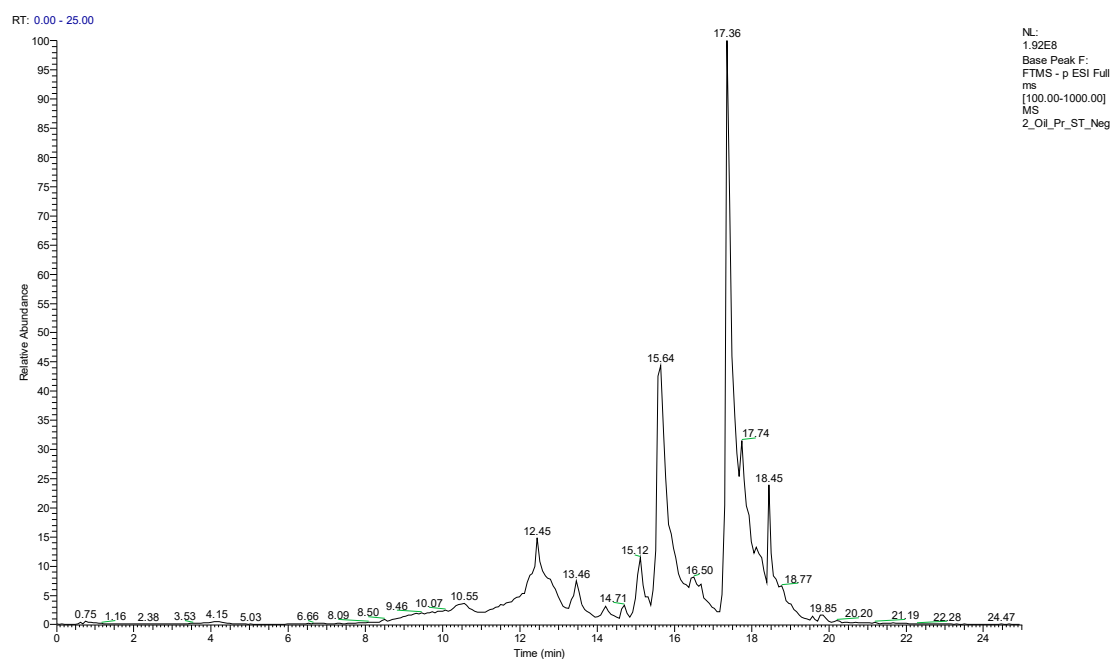

**Figure S2-C:** LTQ/Orbitrap HRMS Chromatogram of *Salvia triloba* methanol extract in negative ion mode.

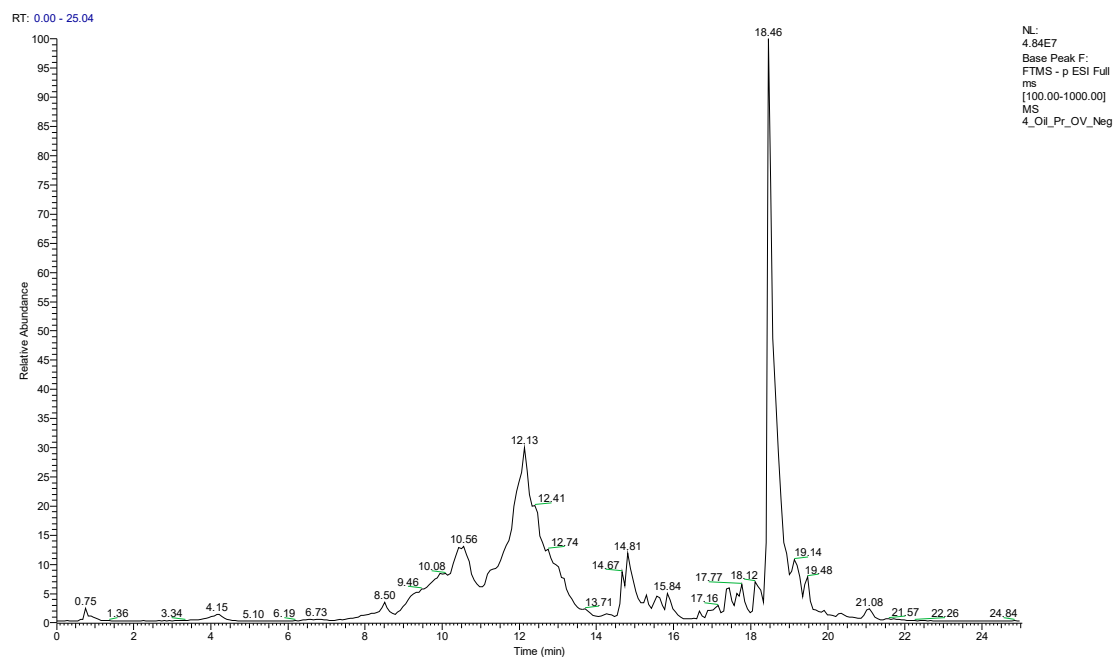

**Figure S2-D:** LTQ/Orbitrap HRMS Chromatogram of hydro-methanolic extracts [MeOH-H<sub>2</sub>O (80:20, v/v)] of the enriched “Lianolia Prevezas” olive oil with *Origanum vulgare* ssp *hirtum* in negative ion mode.

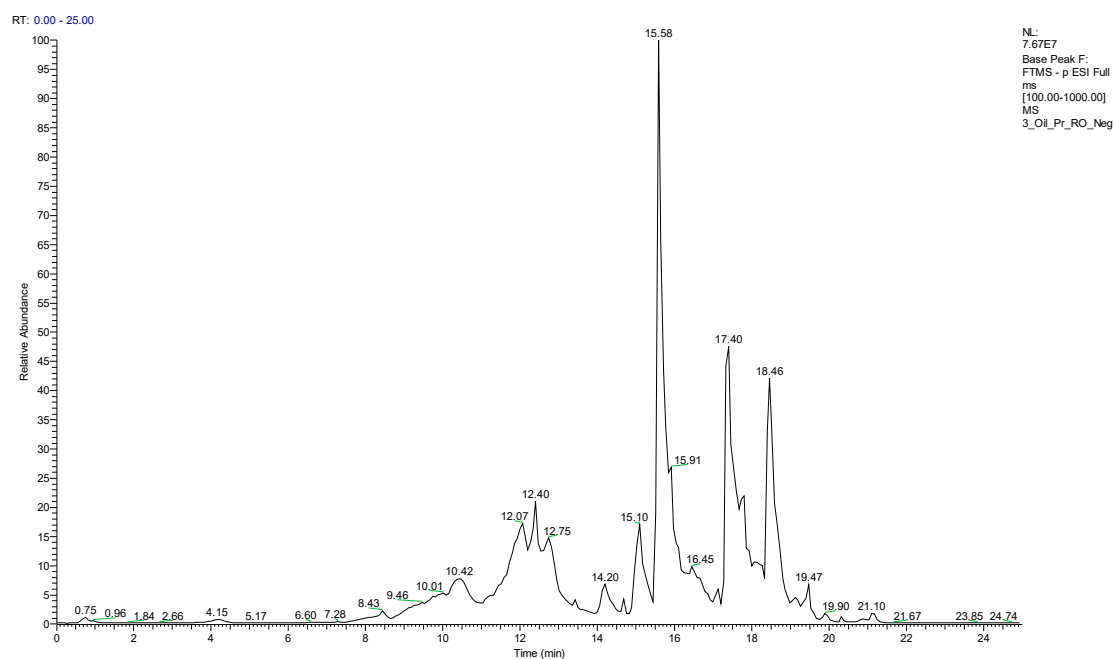

**Figure S2-E:** LTQ/Orbitrap HRMS Chromatogram of hydro-methanolic extracts (MeOH 80/20, v/v) of the enriched “Lianolia Prevezas” olive oil with *Rosmarinus officinalis* in negative ion mode.

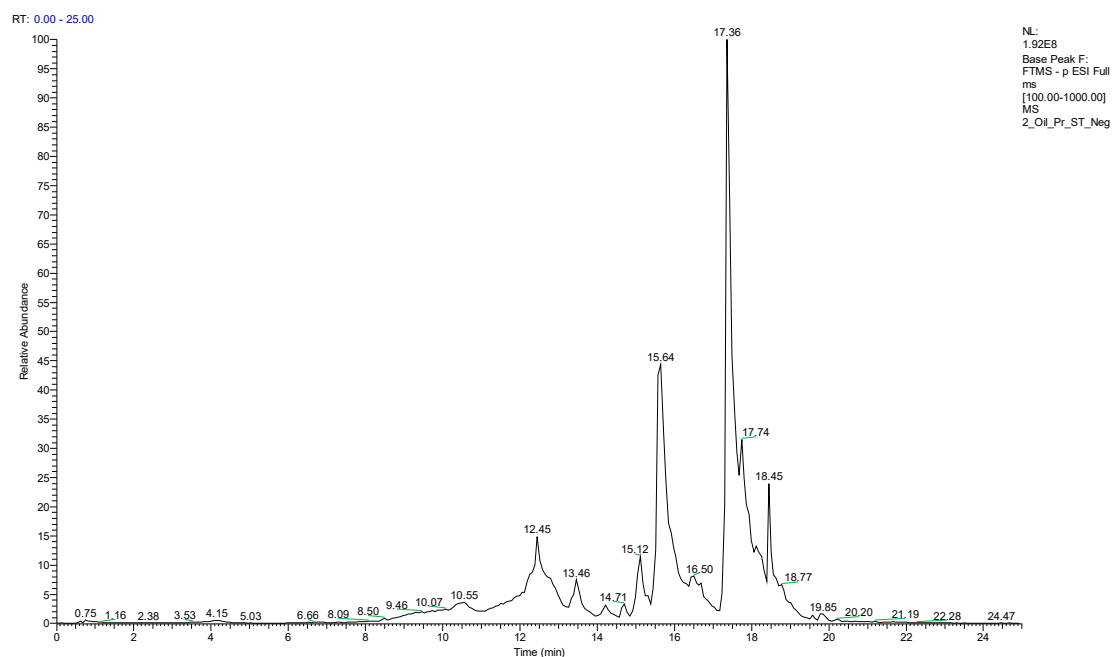

**Figure S2-F:** LTQ/Orbitrap HRMS Chromatogram of hydro-methanolic extracts [MeOH-H<sub>2</sub>O (80:20, v/v)] of the enriched “Lianolia Prevezas” olive oil with *Salvia triloba* in negative ion mode.

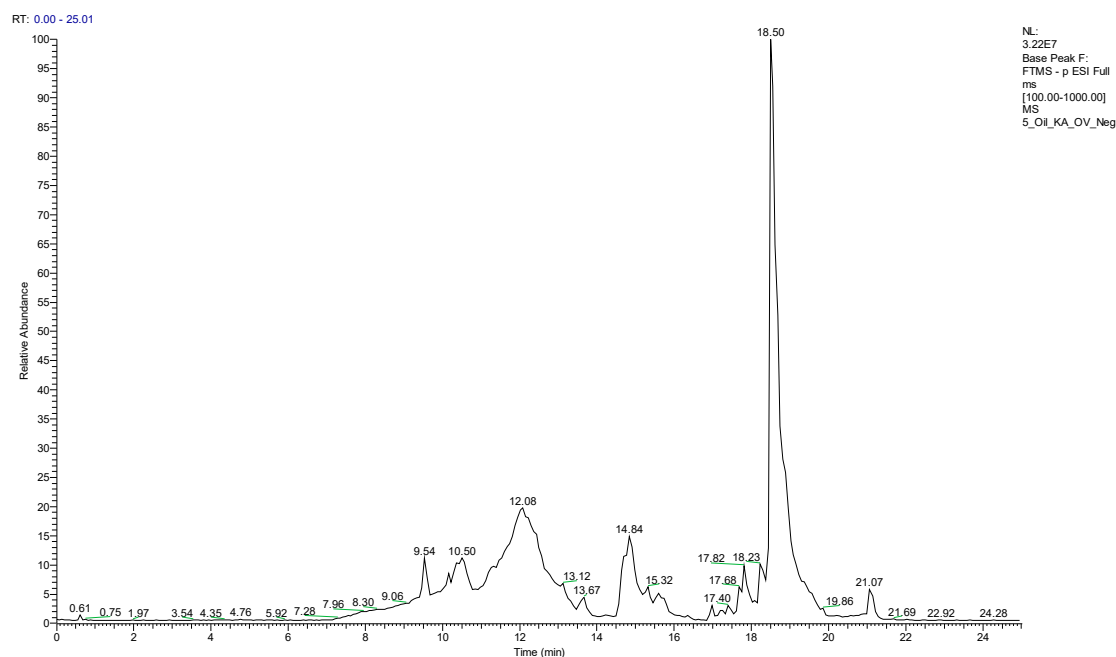

**Figure S2-G:** LTQ/Orbitrap HRMS Chromatogram of hydro-methanolic extracts [MeOH-H<sub>2</sub>O (80:20, v/v)] of the enriched “Konservoelia Artas” olive oil with *Origanum vulgare* ssp *hirtum* in negative ion mode.

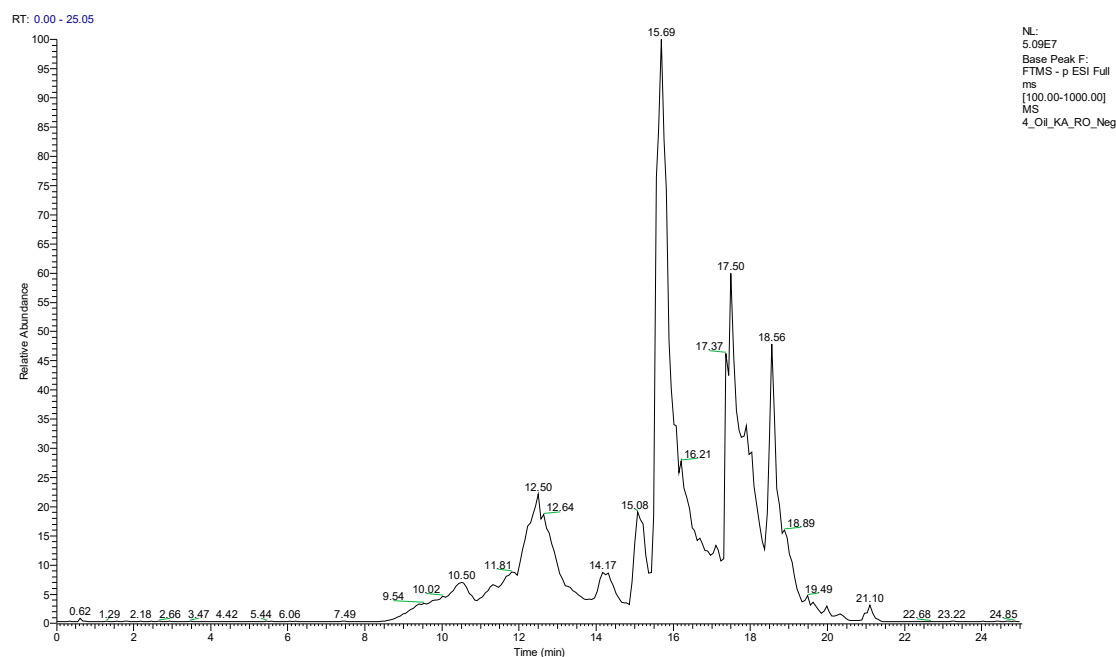

**Figure S2-H:** LTQ/Orbitrap HRMS Chromatogram of hydro-methanolic extracts (MeOH 80/20, v/v) of the enriched “Konservoelia Artas ” olive oil with *Rosmarinus officinalis* in negative ion mode.

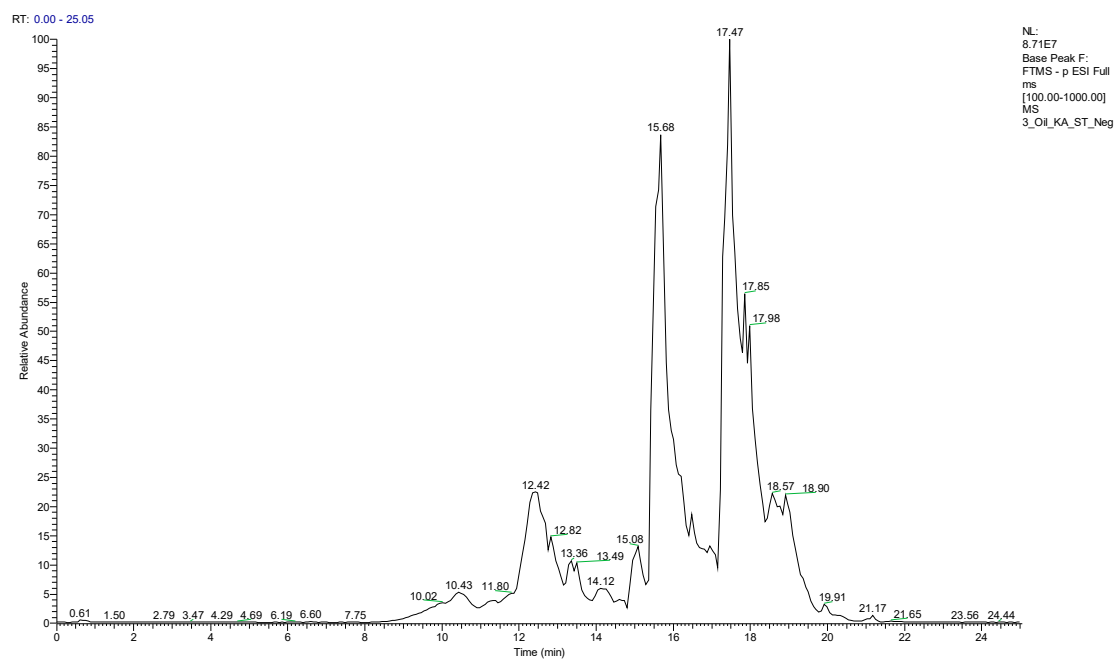

**Figure S2-I:** LTQ/Orbitrap HRMS Chromatogram of hydro-methanolic [MeOH-H<sub>2</sub>O (80:20, v/v)] of the enriched “Konservoelia Artas ” olive oil with *Salvia triloba* in negative ion mode.

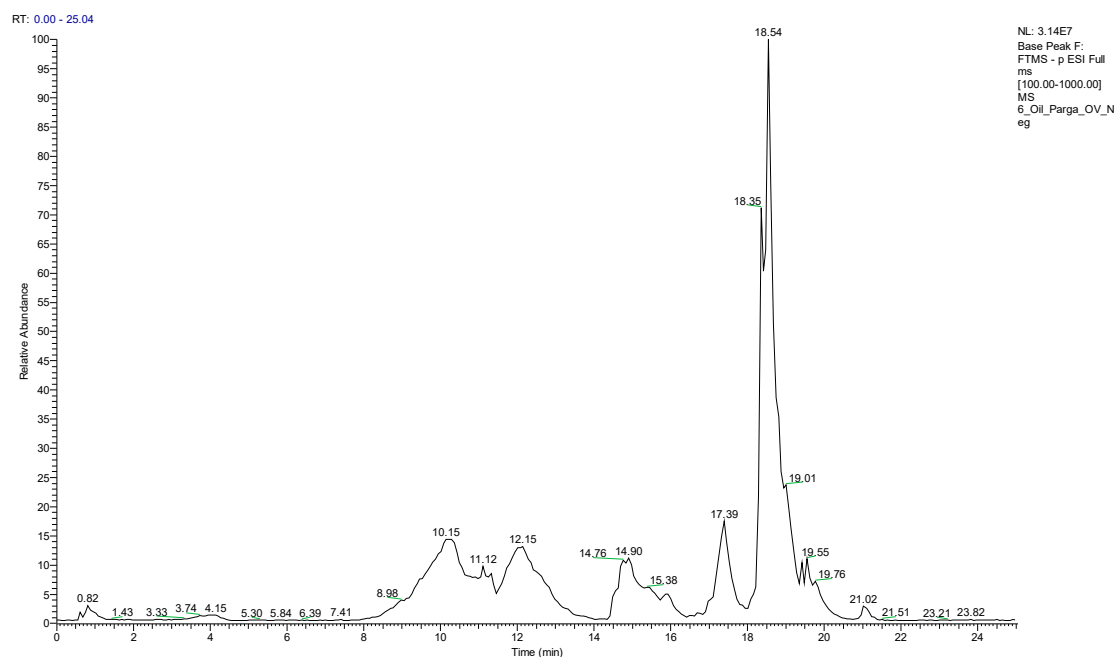

**Figure S2-J:** LTQ/Orbitrap HRMS Chromatogram of hydro-methanolic extracts [MeOH-H<sub>2</sub>O (80:20, v/v)] of the enriched “Lianoelia Kerkiras” olive oil with *Origanum vulgare* ssp *hirtum* in negative ion mode.

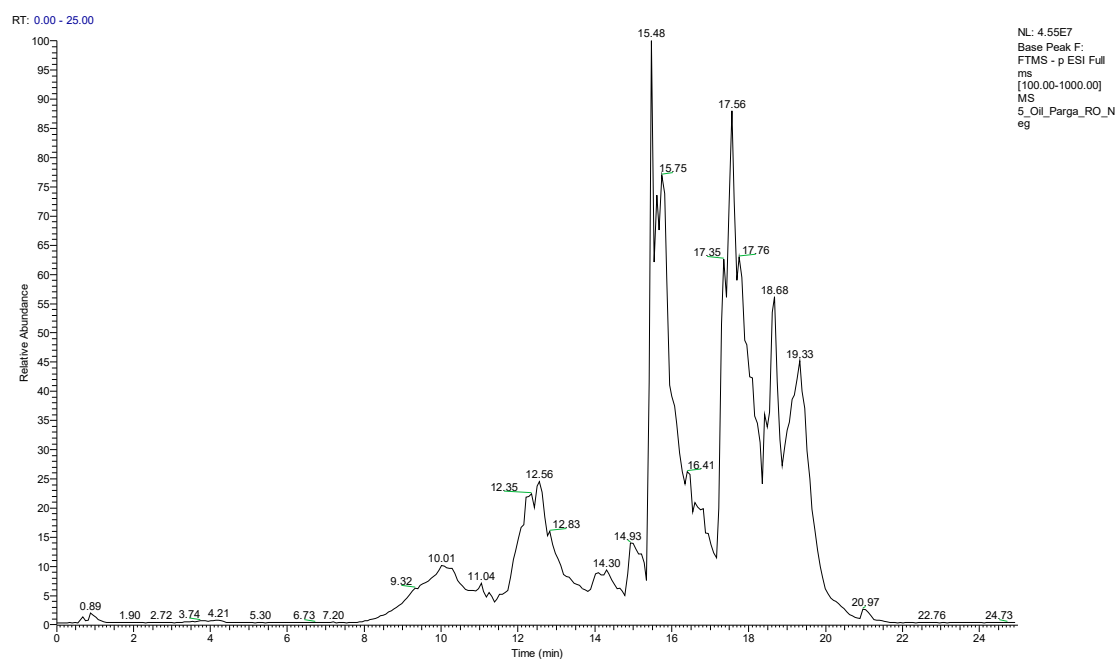

**Figure S2-K:** LTQ/Orbitrap HRMS Chromatogram of hydro-methanolic extracts [MeOH-H<sub>2</sub>O (80:20, v/v)] of the enriched “Lianoelia Kerkiras” olive oil with *Rosmarinus officinalis* in negative ion mode.

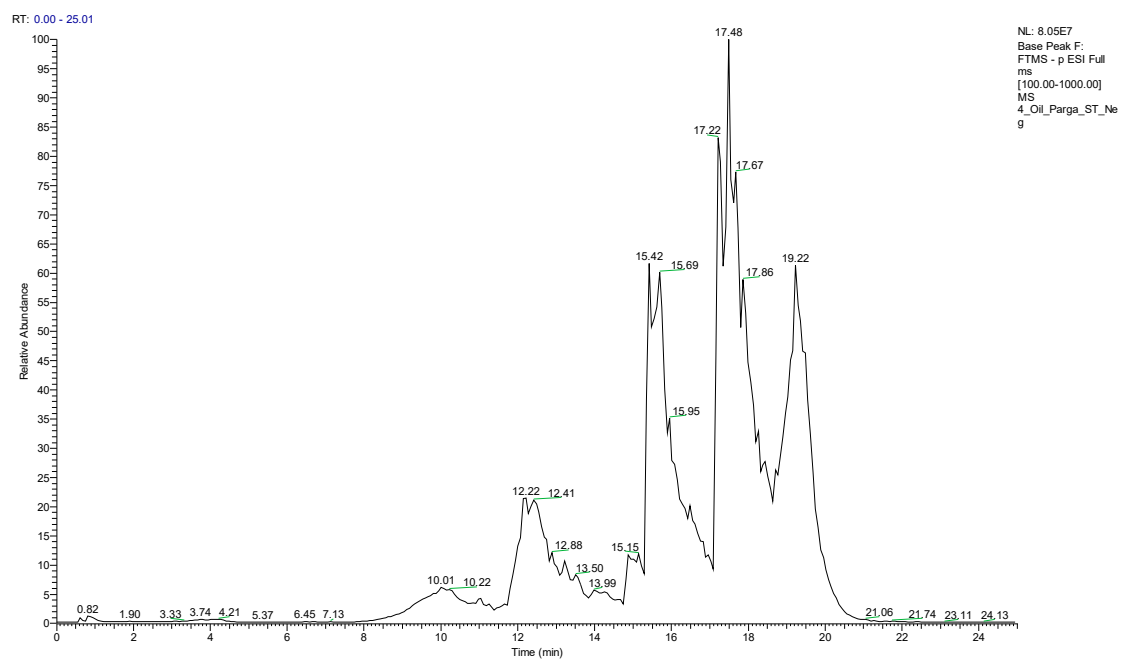

**Figure S2-L:** LTQ/Orbitrap HRMS Chromatogram of hydro-methanolic extracts [MeOH-H<sub>2</sub>O (80:20, v/v)] of the enriched “Lianoelia Kerkyras” olive oil with *Salvia triloba* in negative ion mode.
