# Supplementary material for: Enrichment of Olive Oils with Natural Bioactive Compounds from Aromatic and Medicinal Herbs: Phytochemical Analysis and Antioxidant Potential
Source: MDPI journal article supplement (doi:10.3390/molecules29051141), 2024-03-04
Supplement: s1 [file s1]

Figure S1-A: GC-MS Chromatogram of *O. Vulgare ssp. hirtum* essential oil

Figure S1-B: GC-MS Chromatogram of *Rosmarinus officinalis* essential oil

Figure S1-C: GC-MS Chromatogram of *Salvia triloba* essential oil

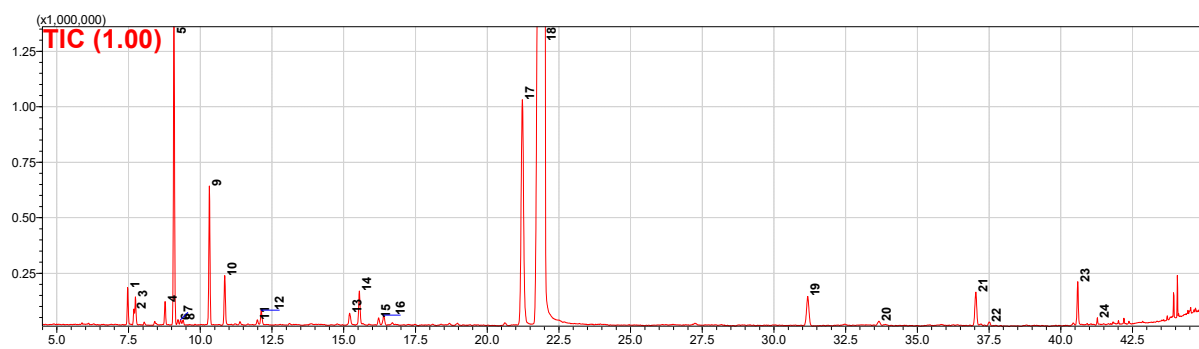

Figure S1-A. Chromatogram of *O. Vulgare ssp. hirtum* essential oil

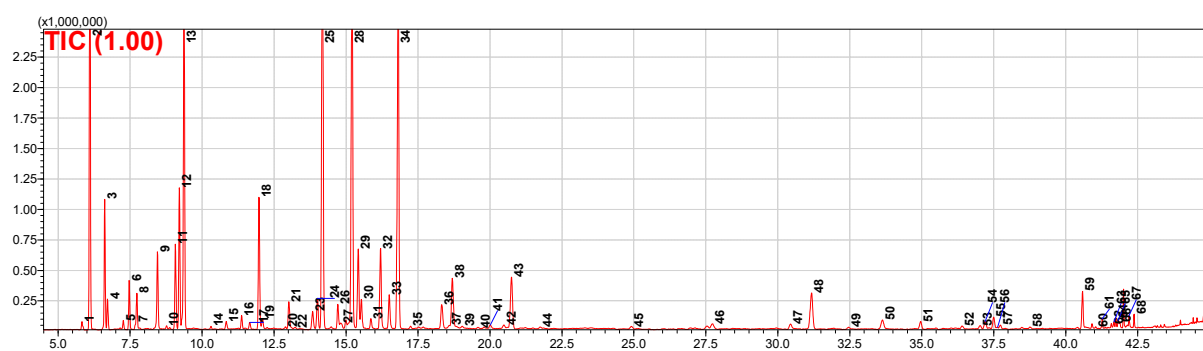

Figure S1-B: GC-MS Chromatogram of *Rosmarinus officinalis* essential oil

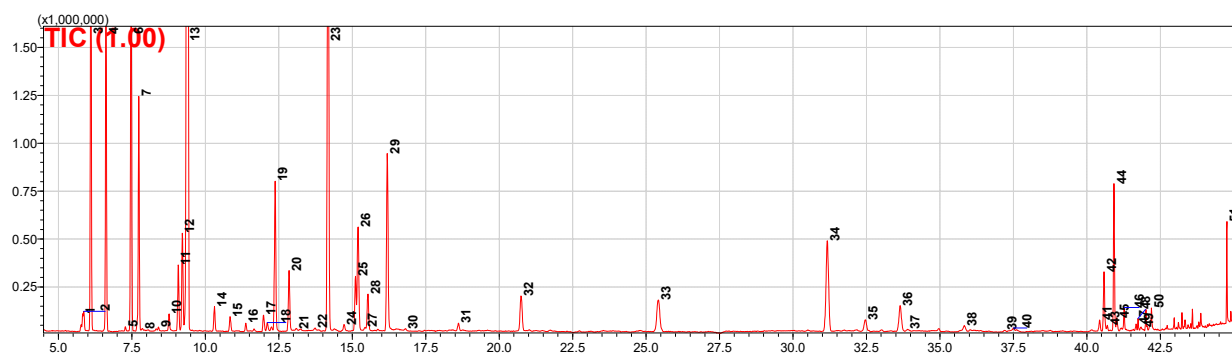

Figure S1-C: GC-MS Chromatogram of *Salvia triloba* essential oil
